# Supplementary material for: TAD boundaries and gene activity are uncoupled
Source: eLife. 2026 Apr 15;15:RP110197. doi: 10.7554/eLife.110197 (PMC13082786; doi:10.7554/eLife.110197)
Supplement: Supplementary file 1. [file elife-110197-supp1.xlsx]

## Sheet: DNA_FISH_Probes
BAC probes Information and hybridization sites
TAD associated gene	Target	Type	BAC ID (Fluro color)	Strand	Genomic size (bp)	Position
EGFR	upstream control	BAC	RP11-112A3	+	176869	chr7:54034866-54211734
	5' TAD	BAC	RP11-117I14	+	173851	chr7:54670940-54844790
	3' TAD	BAC	RP11-98C17	+	167852	chr7:55312852-55480703
TAD associated gene	Target	Type	BAC ID (Fluro color)	Strand	Genomic size (bp)	Position
MYC	upstream control	BAC	RP11-788I22	-	157533	chr8:123725516-123883048
	5' TAD	BAC	RP11-765K23	+	176576	chr8:126761149-126937724
	3' TAD	BAC	RP11-717D13	+	164460	chr8:129618087-129782546
TAD associated gene	Target	Type	BAC ID (Fluro color)	Strand	Genomic size (bp)	Position
ERRFI1	upstream control	BAC	RP11-279H6	+	146074	chr1:7146513-7292586
	5' TAD	BAC	RP11-338N10	-	202055	chr1:7658861-7860915
	3' TAD	BAC	RP11-366K21	+	183202	chr1:8241991-8425192
TAD associated gene	Target	Type	BAC ID (Fluro color)	Strand	Genomic size (bp)	Position
VARS2	upstream control	BAC	RP11-192H11	-	110662	chr6:29886681-29997342
	5' TAD	BAC	RP11-159K11	+	153783	chr6:30380988-30534770
	3' TAD	BAC	RP11-803D22	-	186463	chr6:31007736-31194198
TAD associated gene	Target	Type	BAC ID (Fluro color)	Strand	Genomic size (bp)	Position
FKBP5	upstream control	BAC	RP11-107C8	+	163254	chr6:34464248-34627501
	5' TAD	BAC	RP11-78C20	+	173686	chr6:35379703-35553388
	3' TAD	BAC	RP11-828B18	-	161296	chr6:36271697-36432992

## Sheet: nscRNA_FISH_Probes
Stellaris® FISH probes hybridization sites
Gene	#	EGRF_Atto647N	MYC_Atto647N	ERRFI_Quasar670	VARS2_Atto647N	FKBP5_Atto647N
Probe sequence (5' to 3')	1	cggccgaagaacgaaacgtc	aatgggaaaggtatccagcc	atgtgacacatttgctgtgg	catgagagatagggctcaga	LGC BioSearch Technologies catalog# ISMF-2059-5
	2	aacgaggaaactaaccgccg	cccgttaaataagctgccaa	agtaagggatcagtgcaaat	agagtgcatggtatcgacag
	3	cttggataggcaagacgagg	ctctccttcctaataagagt	ctattgtgtaacactgaccc	cctgtctctaattagcacag
	4	tgtcaagtgggtttatggtc	caaatctctccagatctgct	gcaccaggatattatttgtc	agtctcagaaacccaaggac
	5	taaaccttccaaggcatgtt	ccaaggtttcagaggtgatg	aagtttaggtttttttcctt	tacttacctttcttttcacc
	6	agccaatgacatcaacagca	gaagggatgggaggaaacgc	tgtcttcagatagccaagtt	ccactaaccactgaacttgt
	7	acaattccagatgtcctcaa	tgcaaacatgggcagtctaa	gttagtcagcatcaatctct	atctgtgaaggcagaggaga
	8	gagaagaaacctttccacca	ggagacaaacggggaggggg	tagttcctcaacttcaggac	atgtgagctcaactctgagg
	9	ctgacacctgactaacagga	cgggaggtaagaagaagtgg	agctgcaaggcatggataac	gggaacctgccaagagaaat
	10	ggagcattctgttttgagtg	ccccagggcaattaaaatgt	cacccagtaactcatatctt	agtggagaggagggaattgg
	11	taatttgcccctgaaaatcc	tatcctcattcatacactcc	ggtacattctttacatcctc	cttccaagaactcaagcagc
	12	aagttagcatgtcccagaac	cactctcagagatcaatcct	tcagtaaaagcctgggacag	ggtgcctgcaacaaaaatgc
	13	tacctctaagagcagcaagt	gttaagagggaagcaattca	aagttctgcaagattactgg	tgtagcaattcctgcatgat
	14	tctcctgaaaccagaactcg	attaaatcccaccacttctc	actaatttccattatcctgt	gcttttgcccaagaaaagga
	15	catttgcacacacctgattt	ccctcatttttgtagatagt	ttctccagttactacttgtt	gaacagagtcaggttgcttg
	16	aacagagggctgaggaactc	ctgcctagcctctaaacaca	gagtttctacagtattggca	agtggtgggaggcaagaaac
	17	ctcagttgggaattcgactc	actcttgaggcagttcactg	agccactgtattttatgctg	gccaaggattacaagtcagg
	18	tactgaatgggaacgtctcc	ctttagcaactccctatttt	cctgacttattaaaccagcc	atctctgaggaagtcagagc
	19	tctctttaagacagctcgga	agctgcaaattgcttggtat	caaaagcagacctcctactg	accaaatgttaacaggctcc
	20	cattaatatccccactttgg	acacttcaggtgttgcaaat	cgtgagggtacttatatgta	ttgaaaggtgggaatgggcg
	21	gaagcctgaagggtcaaagt	atttttgagggactttacca	ctaacagaggatttggggga	gcatgagataacagacccag
	22	agcaagagcagaaaccctta	aaagcacattcccaagcacc	cctccattaggacagtctaa	gggaaatccaaggatgcttc
	23	ccagtttcttgtattctgtg	aggctttggacacacccaaa		gcctctagaggctaatagaa
	24	aatggactttcggcaatcgg	gccaattcttacctaagact		gagagatggactgatgggtt
	25	tagagttggtttgtcactct	cttcccaggataggacattg		accacatgcactttttgtac
	26	tgcccataatcatcaattgc	ggcatggacaagaaaagtgc		gcactcctgaagaatcacac
	27	acaggcgaaatgtcctcaac	aagggaaagacagctgggtt		agaactgatctctttcctgg
	28	aagcaacatgtgggtgaacc	ttactcctctcaccatgaag		gattctcagtgtcctaatca
	29	atggcctacaggaacaagtt	aaattatctccccaaagagc		ccataagctgatgaccagag
	30	caatctagagatgtcgtcca	acgttagaaaggtctctgga		agtgtttataggaacccagg
	31	ggattcttgcccaaattcaa	taccagattaatgctgtaca		attactgtgtatcgcgagtc
	32	tctaggggctcagtaaacac			gtggaaggtagcaagctaga
	33	ctgctgaaactggtaggagt			accccaggaataagaaggta
	34	aaactaagtcagggccatgt	OR LGC BioSearch Technologies catalog# ISMF-2067-5		acatgtggctgaacagcata
	35	tccagacacttaagggcaat			gcttttccagatgtatcatc
	36	caaaagtcatcctttgtcct			aggattagggggacagagag
	37	ccccatgtagaattaaaggc			gactgaaggcctctagagaa
	38	ttccatttgtggctaaacgt			agaccctggagaaaaagcgg
	39	gagccaggaaactgtgagag			cggctgaaagagagacaggg
	40	tcaatttcgatgctgacggt			tcattccaattctcagggag
	41	agagagaagctggtatccag			gagtaaggatatgagccagc
	42	tgcaactaatcagctgctga			tgagcatgaagcacatgacc
	43	tccgagtatttgcagcaata			agaaatgccacttcagggag
	44	tgtggtcttaagcagggaac			tctccctgcaaaagtaggaa
	45	aacatgtaatccactcctca			cttctgtatcttgggatctg
	46	gatttctttcgttacgagct			ggggaagaggagcagtaaga
	47	aatgggggtctgagagcaaa			actggagtcacagaaagcgg
	48	ctgtttctggatctcgaagg			ccacattaggggttagaagg
